# Supplementary material for: Detection and Molecular Characterization of Blastocystis Species in Polish Soldiers Stationed in the Republic of Kosovo
Source: MDPI journal article supplement (doi:10.3390/ijms241814100), 2023-09-14
Supplement: s1 [file s1]

## Suppelmentary materials

**Table S 1.** Comparison of positive results of *Blastocystis* PCR obtained for stool samples collected from Polish soldiers participating in a peacekeeping mission in the Republic of Kosovo upon arrival (first part) and after four months of stay (second part).

| Template no.<br>(first/second<br>batch) | Rank    | Age | First batch of samples |         | Second batch of samples |         |
|-----------------------------------------|---------|-----|------------------------|---------|-------------------------|---------|
|                                         |         |     | PCR result             | Subtype | PCR result              | Subtype |
| 151/130                                 | NCO     | 36  | negative               | n/a     | positive                | NI      |
| 242/124                                 | Officer | 42  | negative               | n/a     | positive                | NI      |
| 14/89*                                  | Officer | 30  | negative               | n/a     | positive                | ST4     |
| 75/196                                  | NCO     | 50  | negative               | n/a     | positive                | ST2     |
| 37/186                                  | NCO     | 45  | negative               | n/a     | positive                | ST3     |
| 50/165                                  | NCO     | 43  | negative               | n/a     | positive                | NI      |
| 137/121                                 | NCO     | 43  | negative               | n/a     | positive                | NI      |
| 143/27                                  | Officer | 29  | negative               | n/a     | positive                | ST3     |
| 40/150                                  | Officer | 45  | negative               | n/a     | positive                | ST2     |
| 95/90                                   | NCO     | 34  | negative               | n/a     | positive                | ST7     |
| 54/206                                  | NCO     | 34  | negative               | n/a     | positive                | ST3     |
| 119/122                                 | NCO     | 41  | negative               | n/a     | positive                | NI      |
| 115/172                                 | Private | 40  | negative               | n/a     | positive                | NI      |
| 44/94                                   | Private | 35  | negative               | n/a     | positive                | ST3     |
| 183/92                                  | Private | 32  | positive               | ST3     | positive                | NI      |
| 192/159                                 | Private | 25  | negative               | n/a     | positive                | ST2     |
| 47/66                                   | Officer | 28  | negative               | n/a     | positive                | ST7     |
| 33/203                                  | NCO     | 47  | negative               | n/a     | positive                | ST3     |
| 28/149                                  | Private | 30  | negative               | n/a     | positive                | ST3     |
| 74/217                                  | Private | 26  | negative               | n/a     | positive                | ST3     |
| 35/182                                  | Officer | 29  | negative               | n/a     | positive                | ST3     |

|          |         |    |          |     |          |     |
|----------|---------|----|----------|-----|----------|-----|
| 128/147  | Officer | 28 | negative | n/a | positive | ST3 |
| 88/218   | NCO     | 33 | negative | n/a | positive | ST4 |
| 177/138  | NCO     | 44 | negative | n/a | positive | NI  |
| 197/54   | Private | 29 | negative | n/a | positive | ST3 |
| 194/58   | Private | 24 | negative | n/a | positive | ST2 |
| 141/191  | Private | 38 | negative | n/a | positive | ST4 |
| 135/26   | NCO     | 34 | positive | NI  | negative | n/a |
| 168/123  | Private | 26 | negative | n/a | positive | ST3 |
| 245*/176 | Private | 36 | positive | ST3 | positive | ST2 |
| 46/63    | NCO     | 33 | negative | n/a | positive | ST7 |
| 91/25    | Private | 32 | positive | ST3 | negative | n/a |
| 94/83    | NCO     | 34 | positive | NI  | negative | n/a |
| 116/102  | NCO     | 40 | positive | ST3 | negative | n/a |

NCO – non-commissioned officer, NI – not identified, n/a – not applicable, (\*) – short PCR product (sample 89 – 248 bp, sample 245 – 289 bp)

**A**

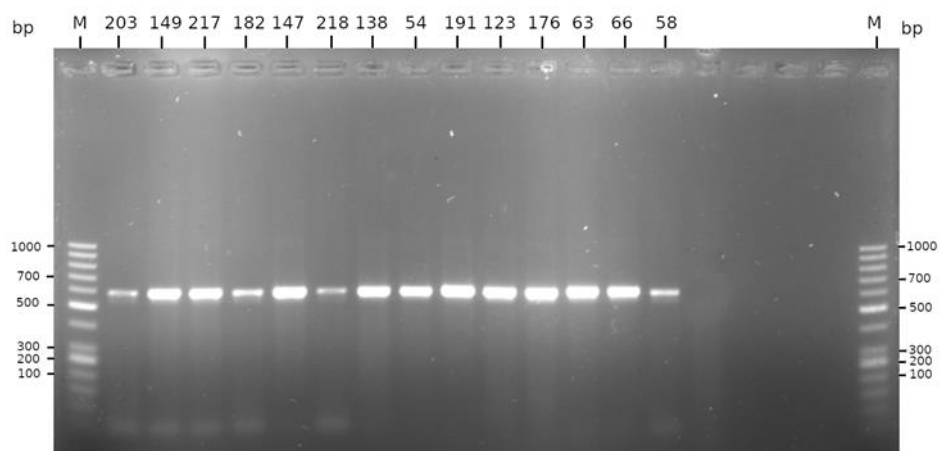

**B**

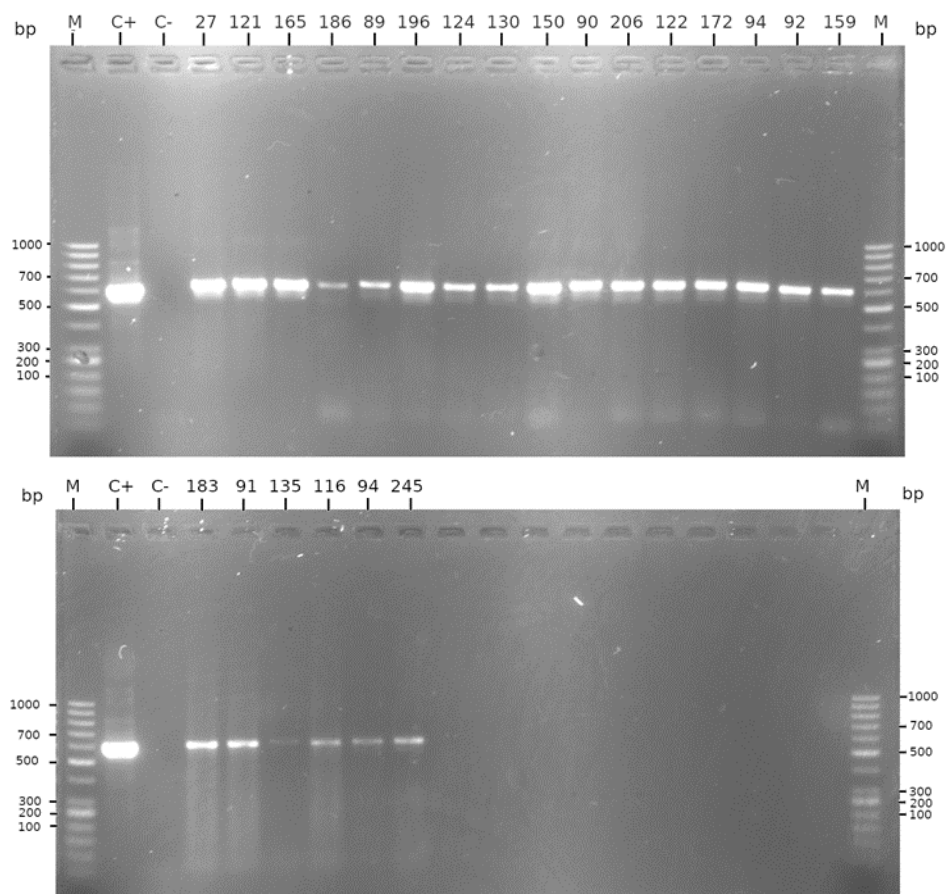

**Figure S1.** Positive results of PCR detection of *Blastocystis* sp. DNA in stool samples collected from Polish soldiers of the Polish Military Contingent stationed in Kosovo. (A) Results for the first batch of samples (soldiers tested upon arrival). M – molecular weight marker (GeneRuler 50 bp DNA Ladder, Thermo Scientific), C(+) – positive control, C(-) – negative control. Numbers 183, 135, 245, 91, and 116 represent positive samples. (B) Positive results in the second batch of samples (soldiers tested after four

months of stay). M – molecular weight marker (GeneRuler 50 bp DNA Ladder, Thermo Scientific), C(+) – positive control, C(-) – negative control.
